# Supplementary material for: Anti-allergic Hydroxy Fatty Acids from Typhonium blumei Explored through ChemGPS-NP
Source: PubMed Central journal article supplement (PMC5474496; doi:10.3389/fphar.2017.00356), 2017-06-19
Supplement: DataSheet1.pdf [file DataSheet1.pdf]

## *Supplementary Material*

### **Anti-allergic Hydroxy Fatty Acids from *Typhonium blumei* Explored Through ChemGPS-NP**

**Michal Korinek, Yi-Hong Tsai, Mohamed El-Shazly, Kuei-Hung Lai, Anders Backlund, Shou-Fang Wu, Wan-Chun Lai, Tung-Ying Wu, Shu-Li Chen, Yang-Chang Wu, Yuan-Bin Cheng, Tsong-Long Hwang\*, Bing-Hung Chen\*, Fang-Rong Chang\***

\* **Correspondence:** T.-L. Hwang: htl@mail.cgu.edu.tw, B.-H. Chen: bhchen@kmu.edu.tw, F. R. Chang: aaronfrc@kmu.edu.tw

#### **Content**

Anti-allergic data with inhibition of degranulation data of fatty acids (1 – 1000  $\mu$ M), Table S1 (attached as xlsx. file).

$^1\text{H}$  NMR,  $^{13}\text{C}$  NMR, 2D NMR data of **1** and **2** and GC-MS data of mixtures A and B (see below).

Bioactivity screening data of *T. blumei* extract and fractions (see below).

#### **Table of Contents**

|                                                                                                                  |     |
|------------------------------------------------------------------------------------------------------------------|-----|
| <b>Figure S1.</b> $^1\text{H}$ NMR spectrum of compound <b>1</b> in $\text{CD}_3\text{OD}$ , 400 MHz.....        | S3  |
| <b>Figure S2.</b> $^{13}\text{C}$ NMR spectrum of compound <b>1</b> in $\text{CD}_3\text{OD}$ , 100 MHz.....     | S4  |
| <b>Figure S3.</b> $^1\text{H}$ - $^1\text{H}$ COSY spectrum of compound <b>1</b> in $\text{CD}_3\text{OD}$ ..... | S5  |
| <b>Figure S4.</b> HSQC spectrum of compound <b>1</b> in $\text{CD}_3\text{OD}$ .....                             | S6  |
| <b>Figure S5.</b> HMBC spectrum of compound <b>1</b> in $\text{CD}_3\text{OD}$ .....                             | S7  |
| <b>Figure S6.</b> NOESY spectrum of compound <b>1</b> in $\text{CD}_3\text{OD}$ .....                            | S8  |
| <b>Figure S7.</b> GC-EIMS spectrum of compound <b>1</b> .....                                                    | S9  |
| <b>Figure S8.</b> $^1\text{H}$ NMR spectrum of compound <b>2</b> in $\text{CD}_3\text{OD}$ , 400 MHz.....        | S10 |
| <b>Figure S9.</b> $^{13}\text{C}$ NMR spectrum of compound <b>2</b> in $\text{CD}_3\text{OD}$ , 100 MHz.....     | S11 |

|                                                                                                                   |                         |
|-------------------------------------------------------------------------------------------------------------------|-------------------------|
| <b>Figure S10.</b> $^1\text{H}$ - $^1\text{H}$ COSY spectrum of compound <b>2</b> in $\text{CD}_3\text{OD}$ ..... | S12                     |
| <b>Figure S11.</b> HMQC spectrum of compound <b>2</b> in $\text{CD}_3\text{OD}$ .....                             | S13                     |
| <b>Figure S12.</b> HMBC spectrum of compound <b>2</b> in $\text{CD}_3\text{OD}$ .....                             | S14                     |
| <b>Figure S13.</b> NOESY spectrum of compound <b>2</b> in $\text{CD}_3\text{OD}$ .....                            | S15                     |
| <b>Figure S14.</b> GC-EIMS spectrum of compound <b>2</b> .....                                                    | S16                     |
| <b>Figure S15.</b> GC-EIMS spectrum of compound <b>3</b> .....                                                    | S17                     |
| <b>Figure S16.</b> GC-EIMS spectrum of compound <b>4</b> .....                                                    | S18                     |
| <b>Figure S17.</b> GC-EIMS spectrum of mixture A .....                                                            | S19                     |
| <b>Figure S18.</b> GC-EIMS spectrum of mixture B .....                                                            | S20                     |
| <b>Table S1.</b> Anti-allergic data of fatty acids (1 – 1000 $\mu\text{M}$ ).....                                 | see attached xlsx. file |
| <b>Table S2.</b> Anti-platelet activity of <i>Typhonium blumei</i> .....                                          | S21                     |
| <b>Table S3.</b> Cytotoxicity of <i>T. blumei</i> .....                                                           | S22                     |
| <b>Table S4.</b> Anti-inflammatory activity of <i>T. blumei</i> .....                                             | S23                     |
| <b>Table S5.</b> Cytotoxicity of <i>T. blumei</i> subfractions.....                                               | S24                     |
| <b>Table S6.</b> Anti-inflammatory activity of <i>T. blumei</i> subfractions .....                                | S25                     |
| <b>Table S7.</b> Anti-allergic activity of <i>T. blumei</i> subfractions .....                                    | S26                     |

**Figure S1.**  $^1\text{H}$  NMR spectrum of compound **1** in  $\text{CD}_3\text{OD}$ , 400 MHz

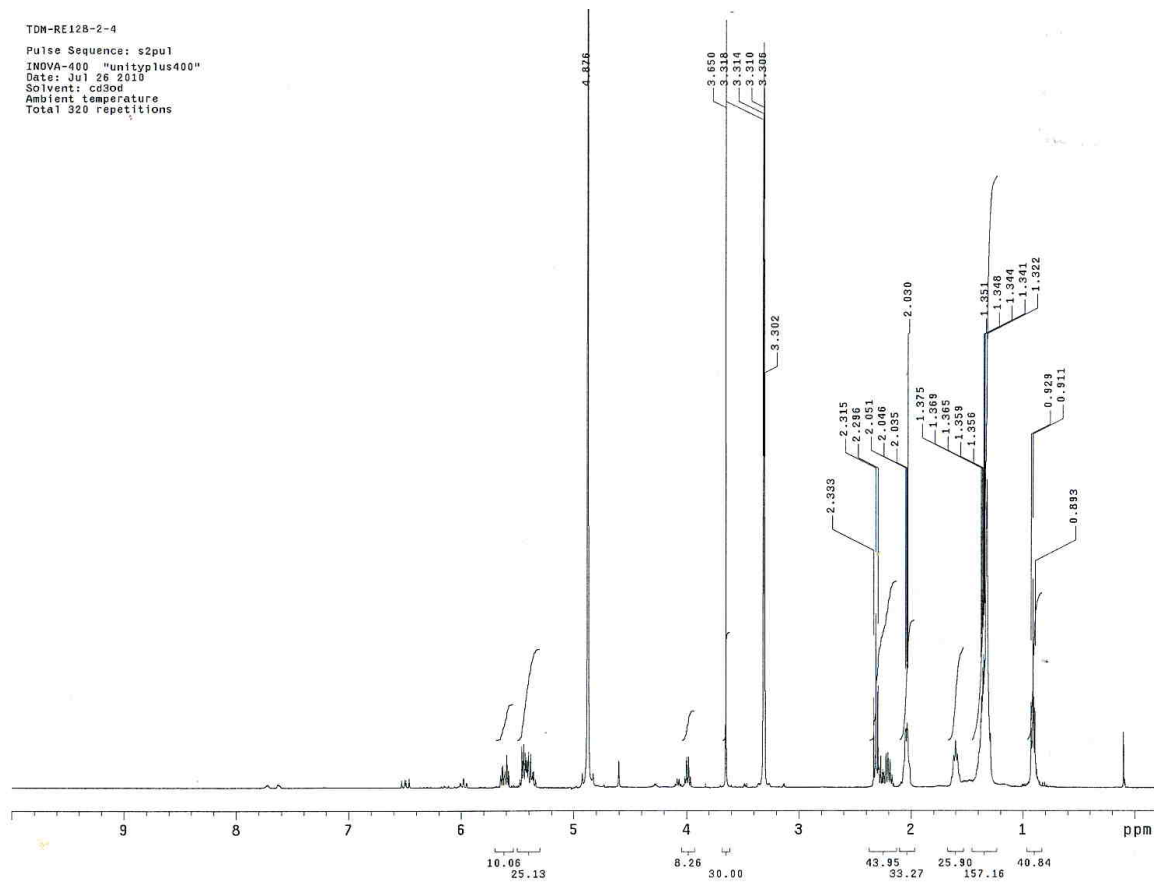

**Figure S2.**  $^{13}\text{C}$  NMR spectrum of compound **1** in  $\text{CD}_3\text{OD}$ , 100 MHz

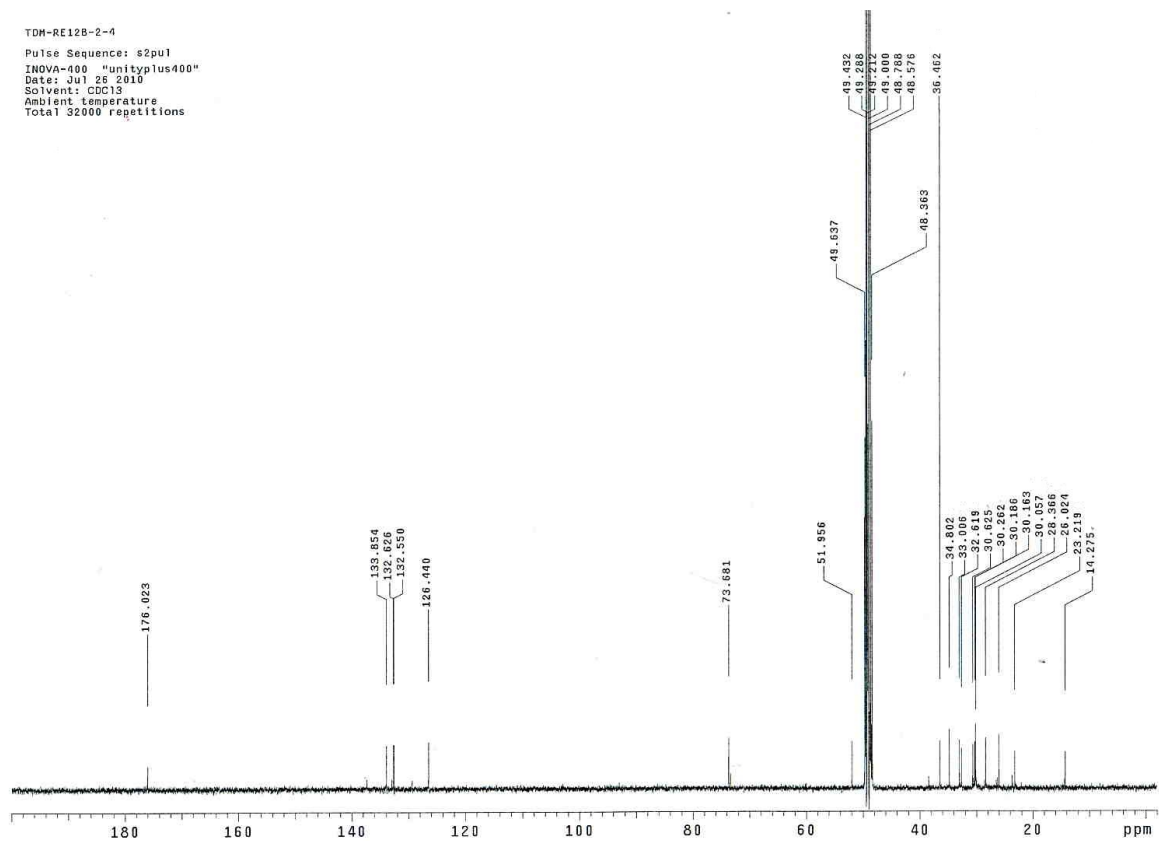

**Figure S3.**  $^1\text{H}$ - $^1\text{H}$  COSY spectrum of compound **1** in  $\text{CD}_3\text{OD}$

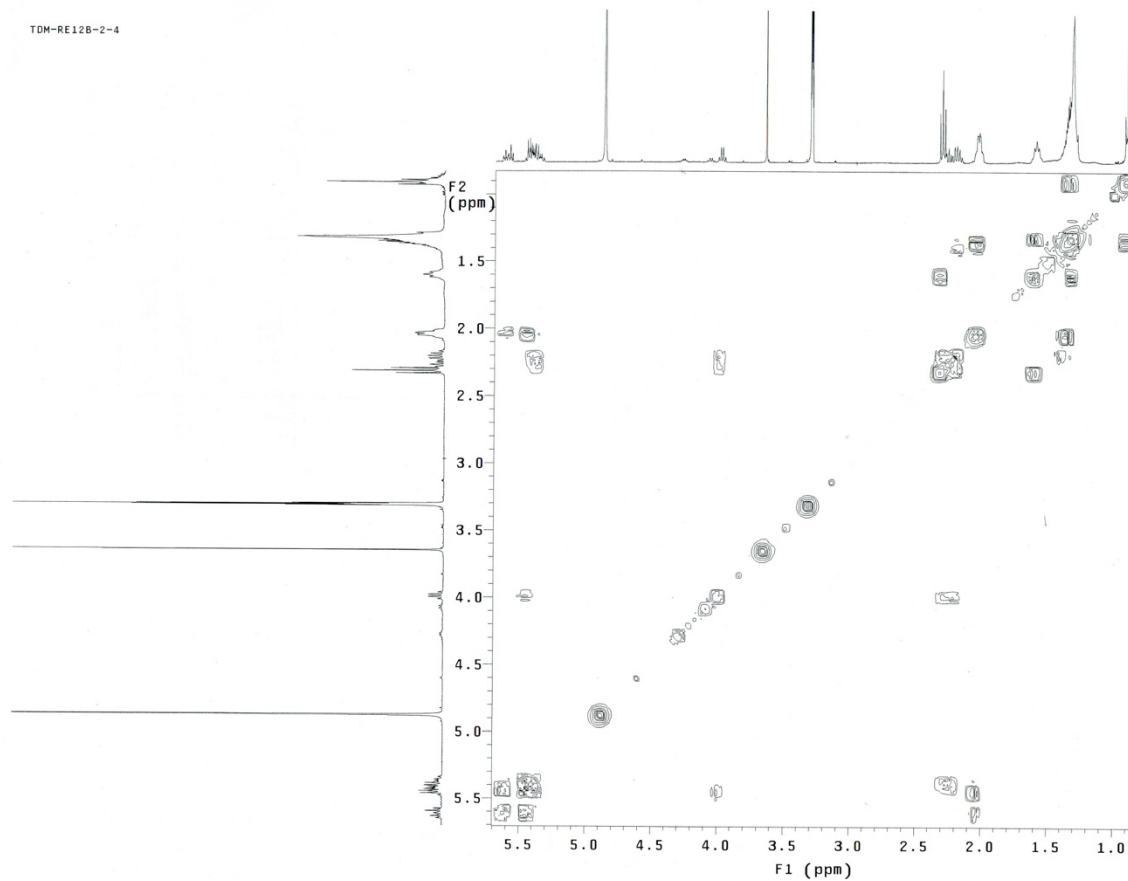

**Figure S4.** HMQC spectrum of compound **1** in CD<sub>3</sub>OD

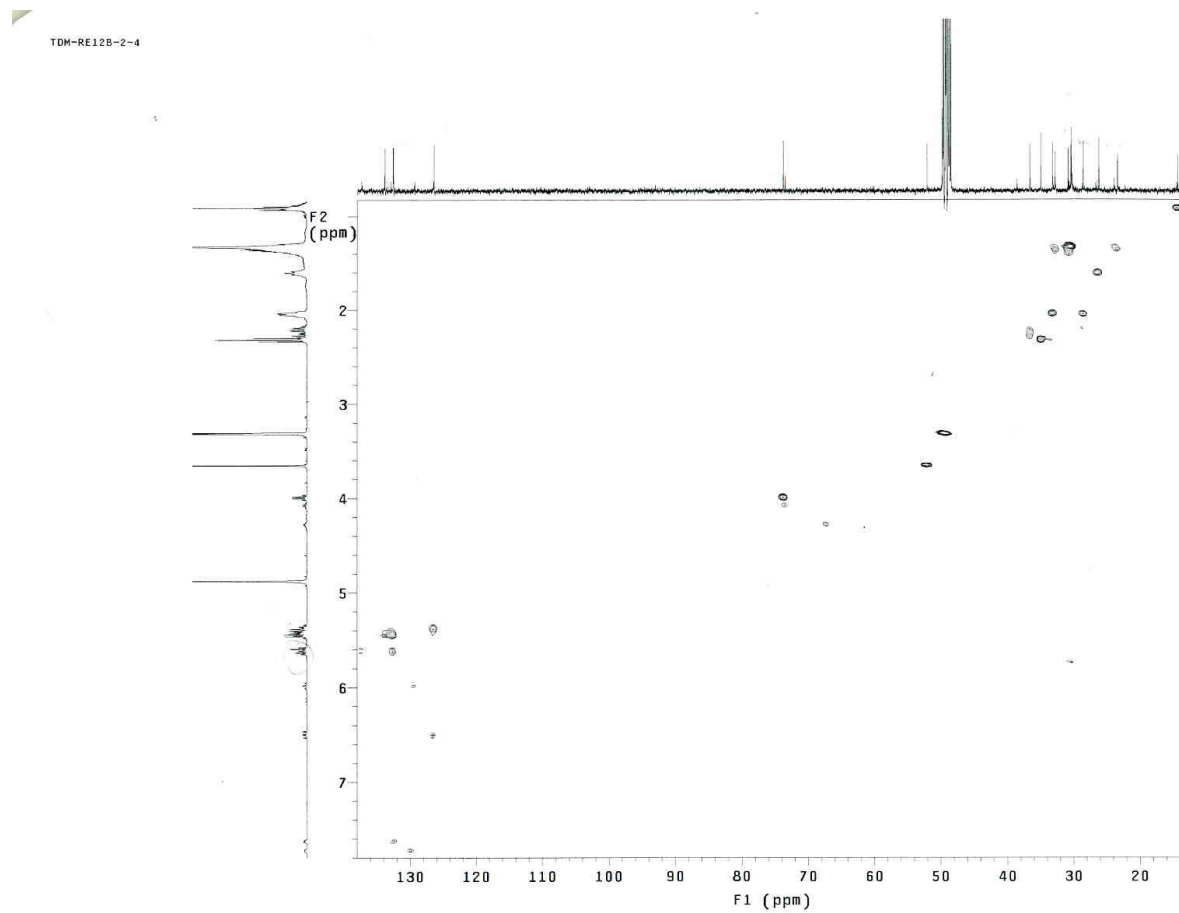

**Figure S5.** HMBC spectrum of compound **1** in CD<sub>3</sub>OD

TDM-RE128-2-4

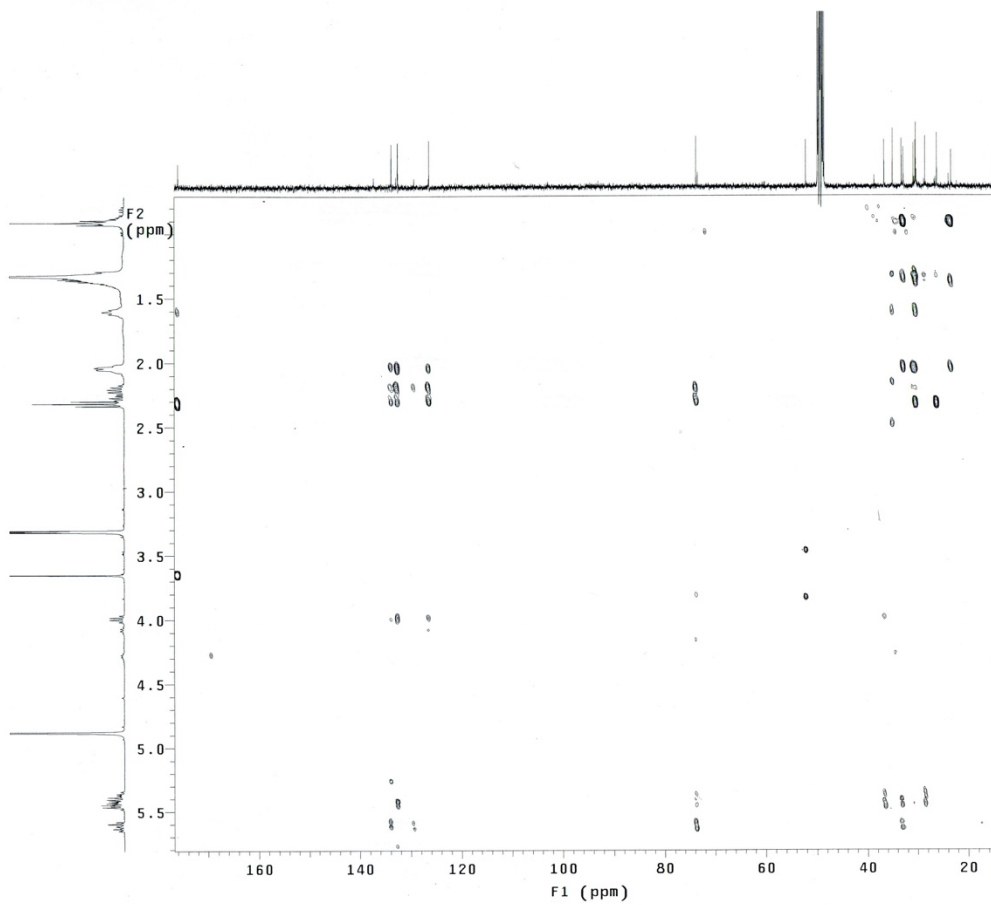

**Figure S6.** NOESY spectrum of compound **1** in CD<sub>3</sub>OD

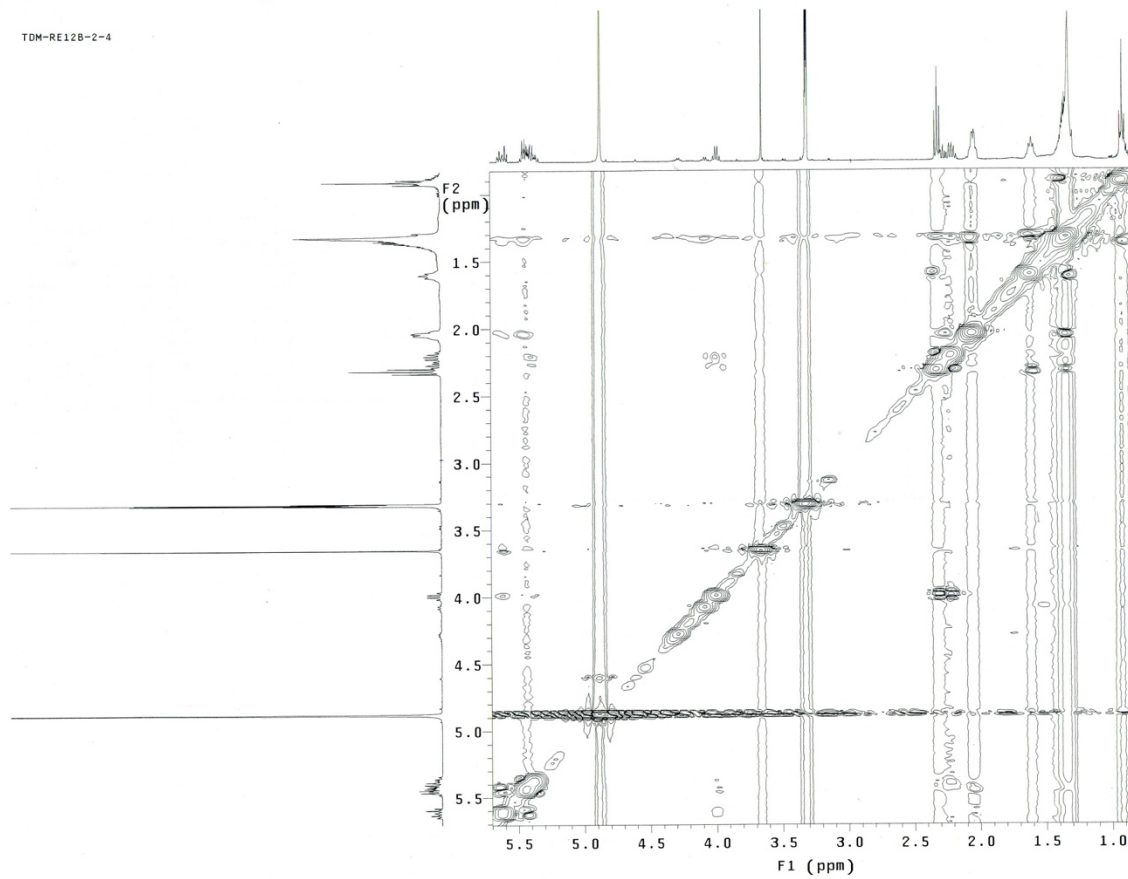



**Figure S7. GC-EIMS spectrum of compound 1**

RT: 4.98 - 25.02

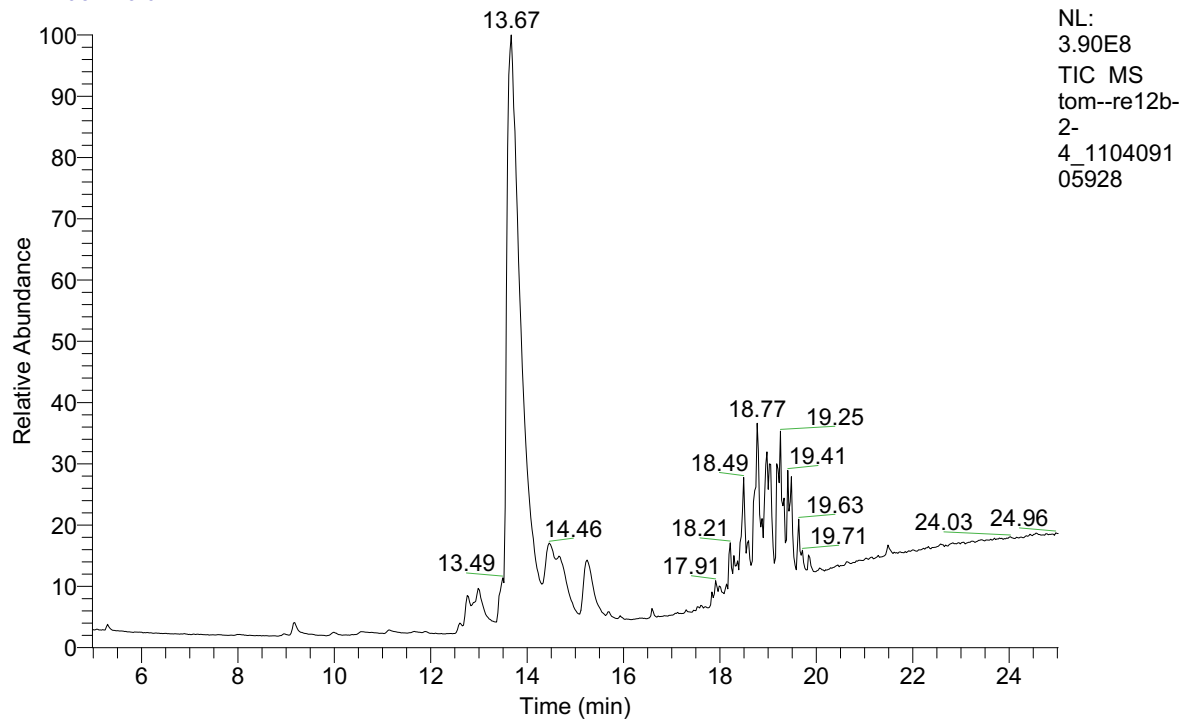

tom--re12b-2-4\_110409105928 #534-547 RT: 13.57-13.90 AV: 14 NL: 3.90E7  
T: + c Full ms [50.00-800.00]

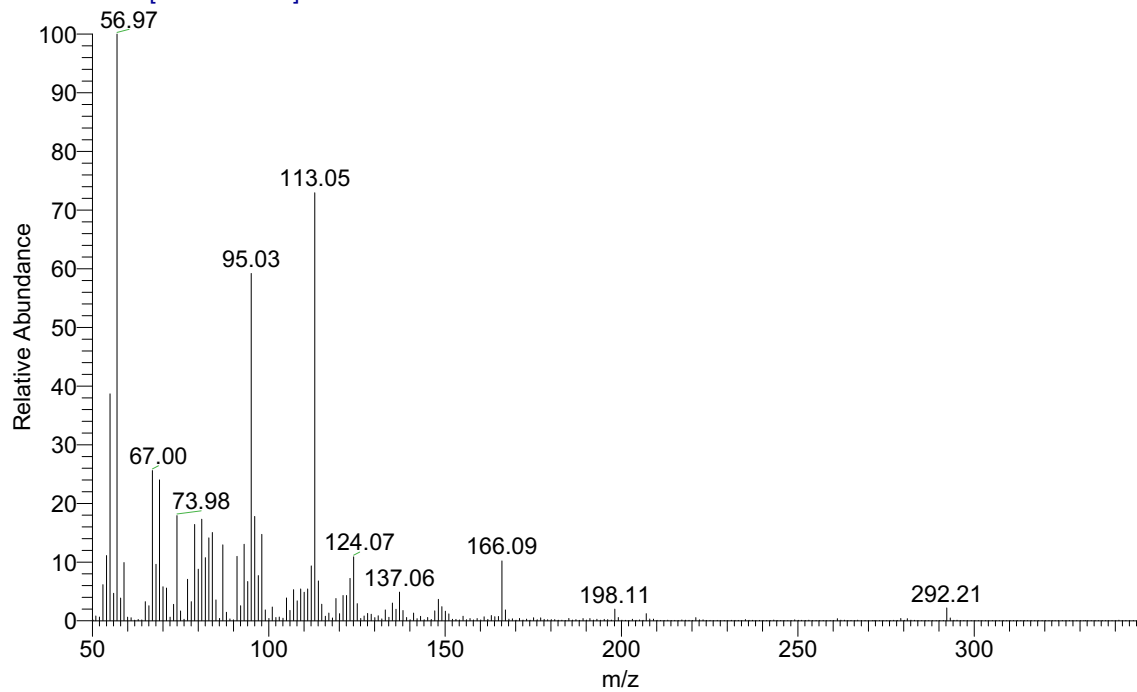

**Figure S8.**  $^1\text{H}$  NMR spectrum of compound **2** in  $\text{CD}_3\text{OD}$ , 400 MHz

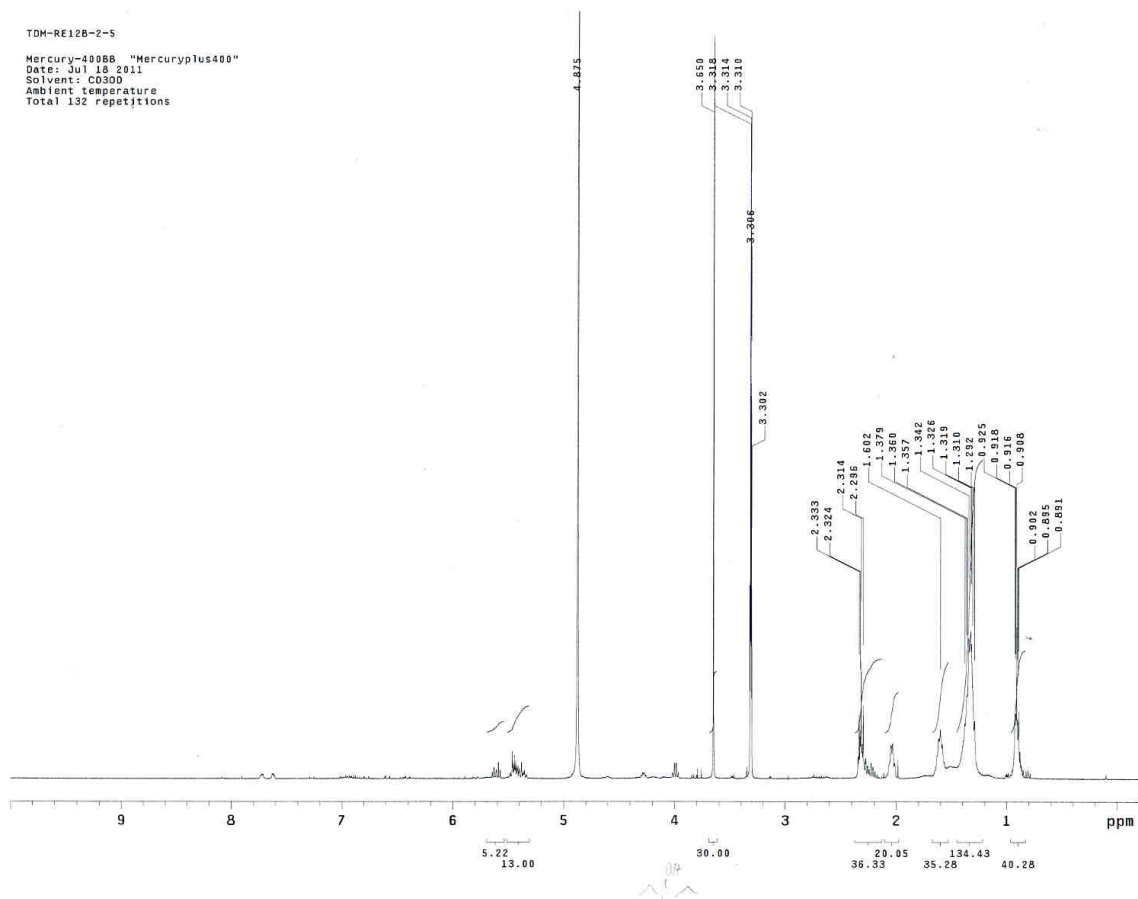

**Figure S9.**  $^{13}\text{C}$  NMR spectrum of compound **2** in  $\text{CD}_3\text{OD}$ , 100 MHz

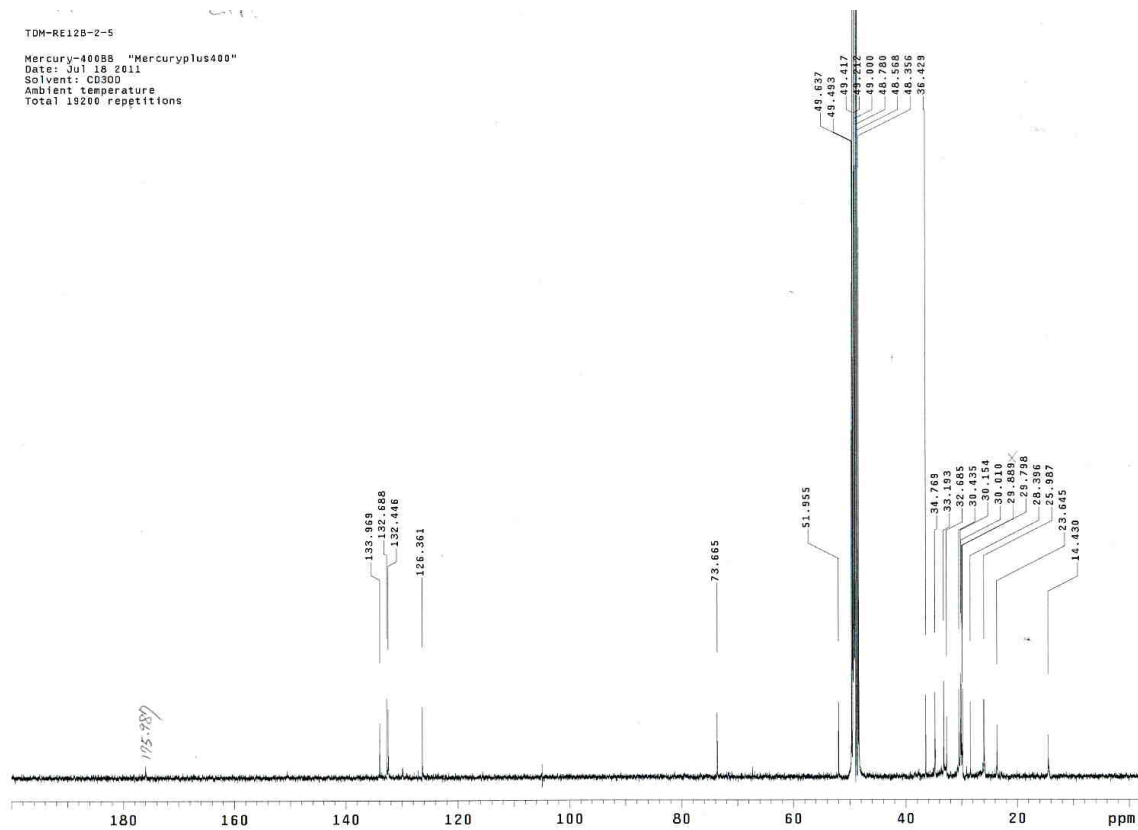

**Figure S10.**  $^1\text{H}$ - $^1\text{H}$  COSY spectrum of compound **2** in  $\text{CD}_3\text{OD}$

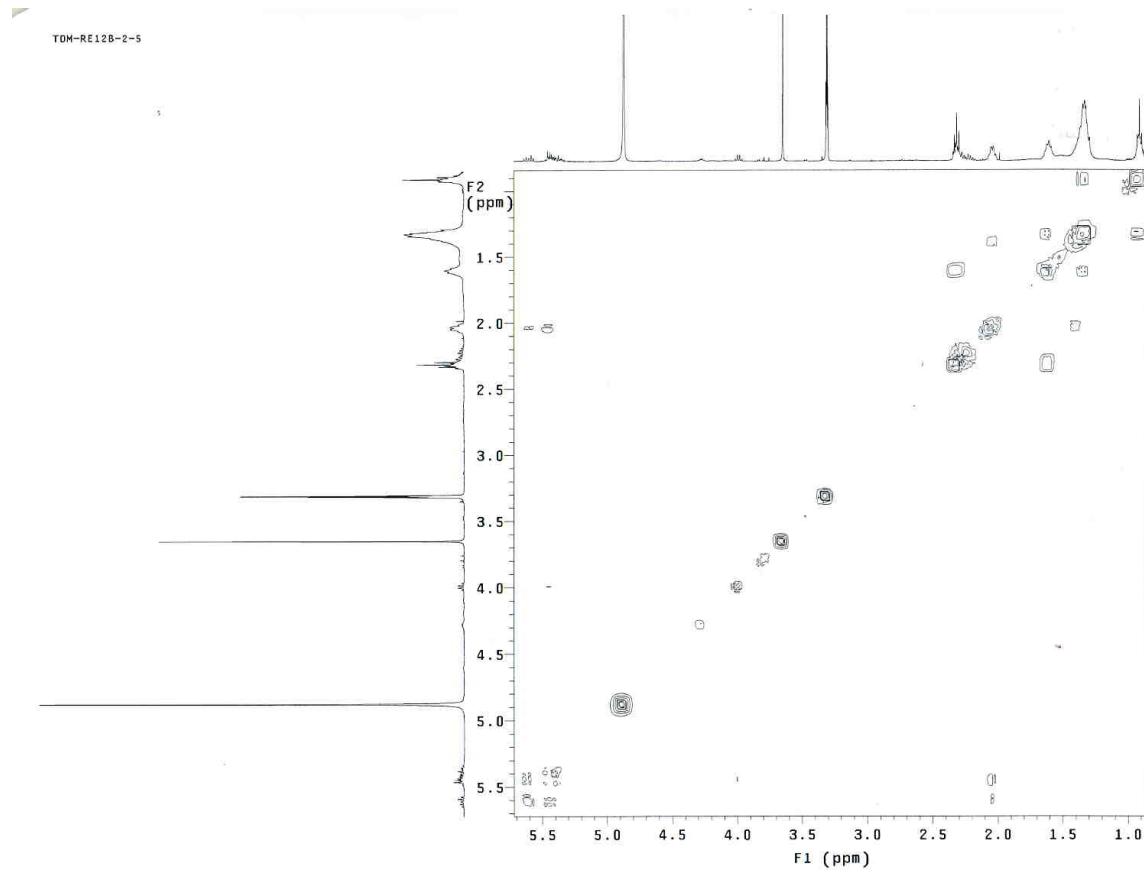

**Figure S11.** HMQC spectrum of compound **2** in CD<sub>3</sub>OD

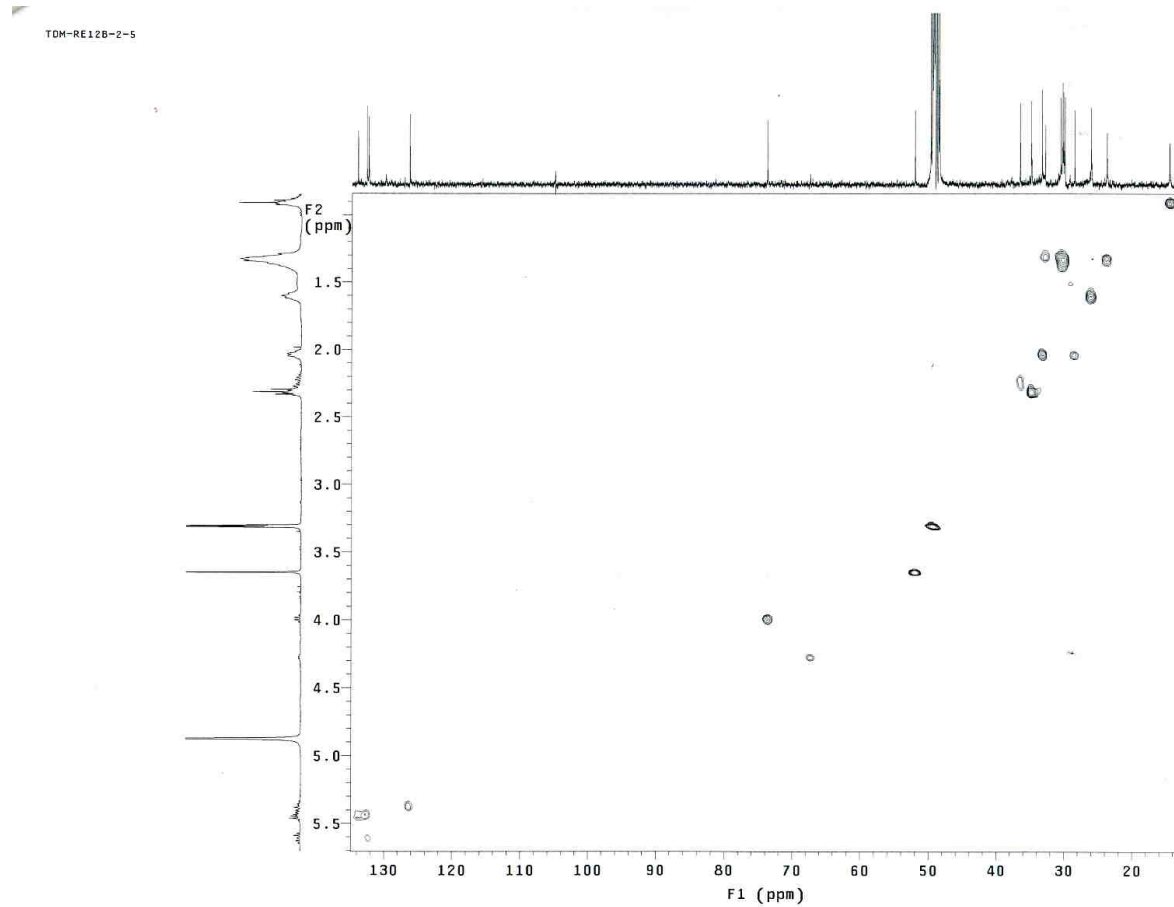

**Figure S12.** HMBC spectrum of compound **2** in CD<sub>3</sub>OD

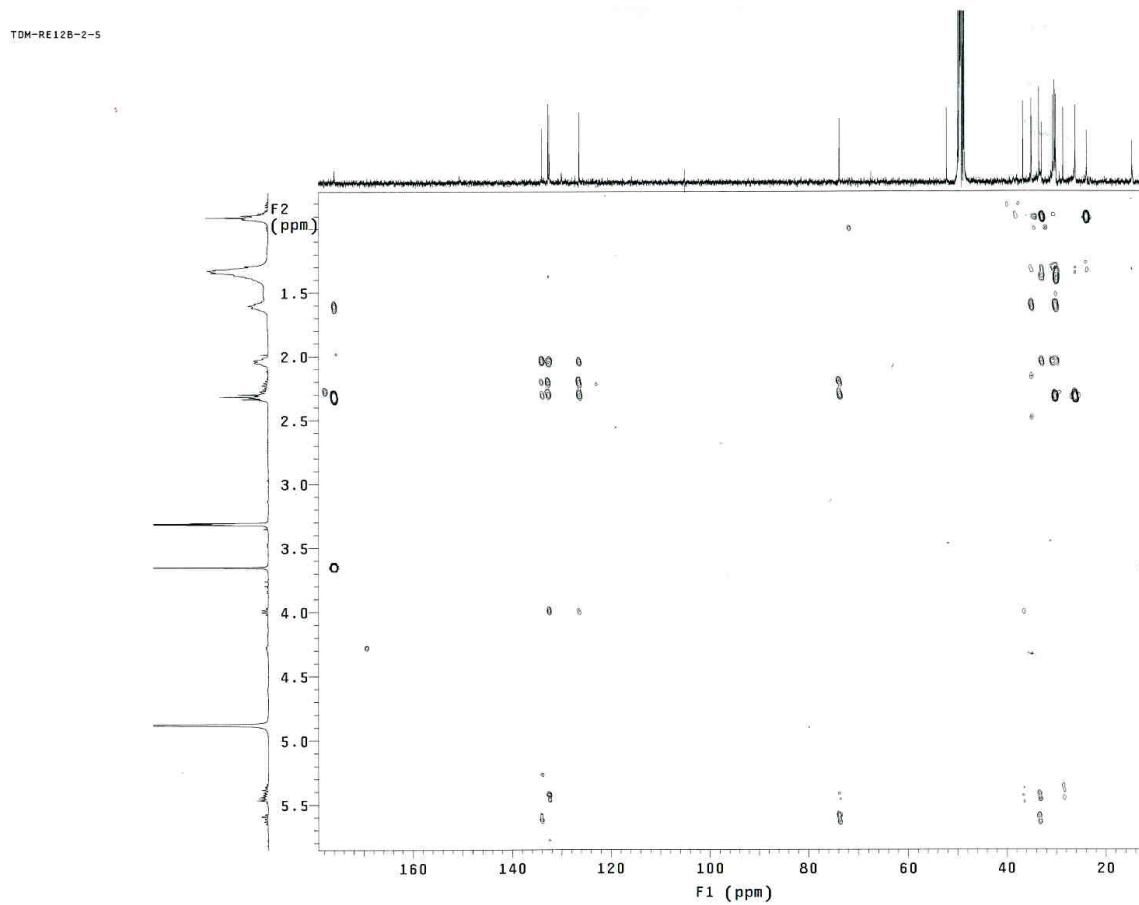

**Figure S13.** NOESY spectrum of compound **2** in CD<sub>3</sub>OD

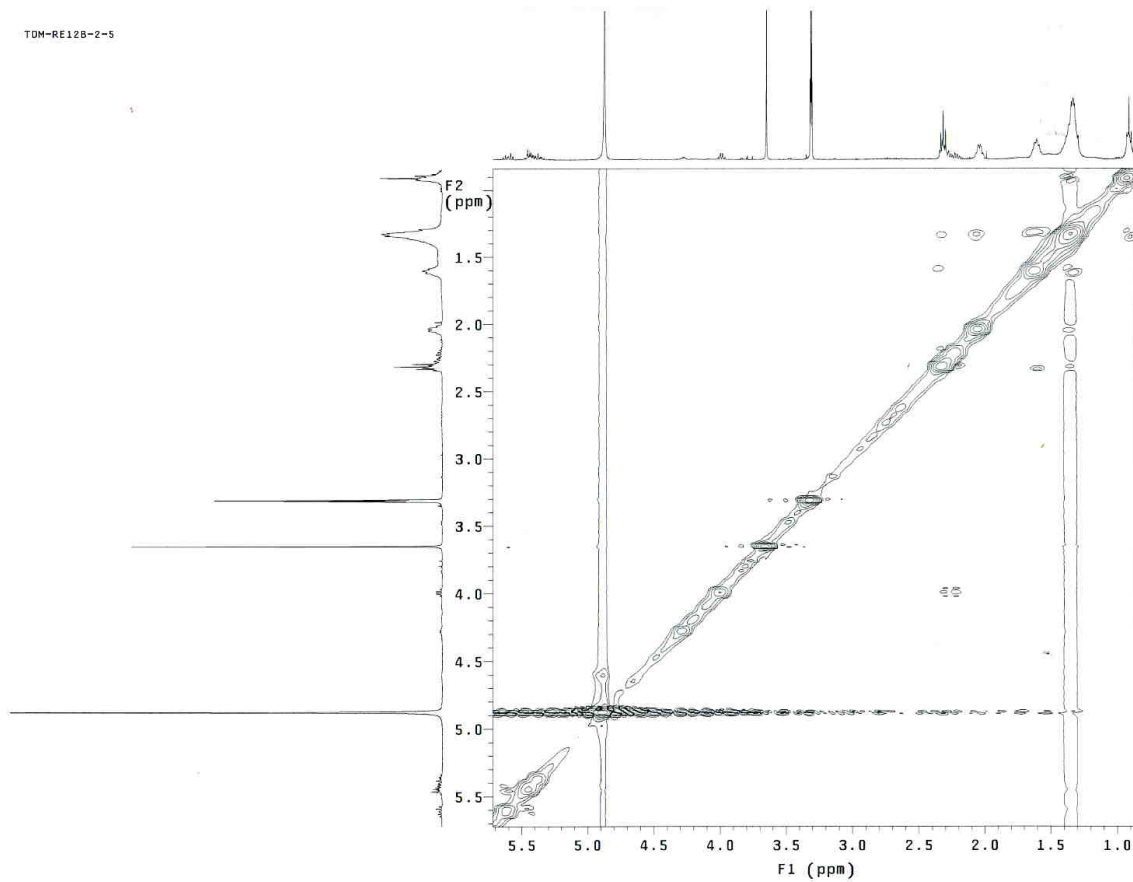

**Figure S14.** GC-EIMS spectrum of compound 2

RT: 0.00 - 19.00

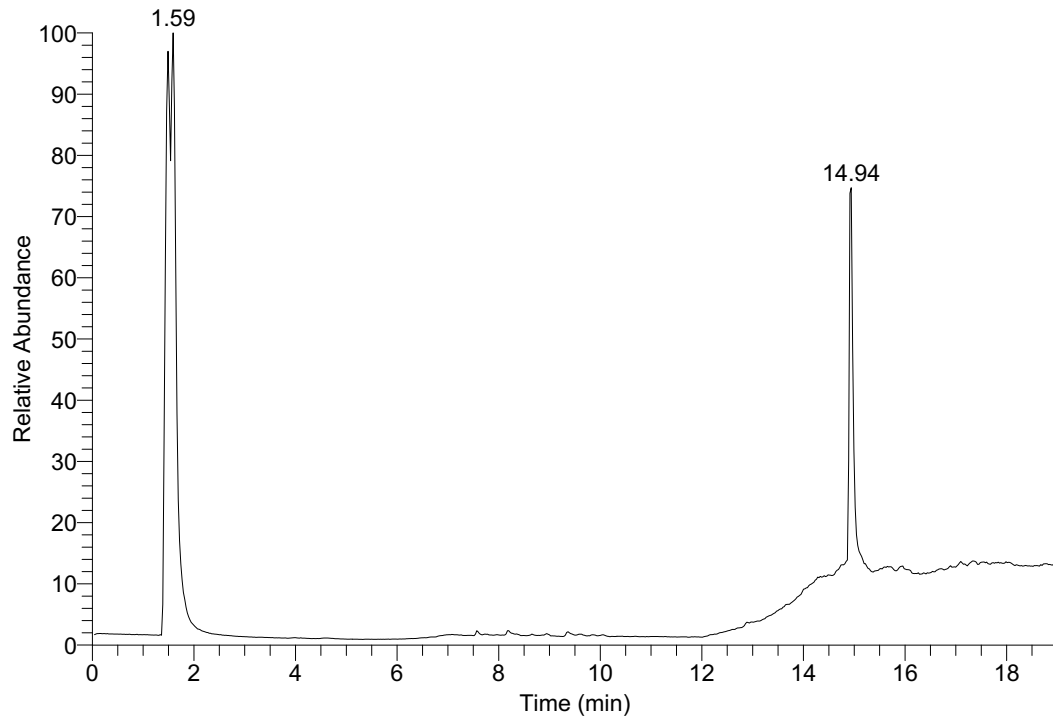

NL:  
6.78E8  
TIC MS  
NO1-  
20110825-  
20110825

NO1-20110825-20110825 #577 RT: 14.92 AV: 1 NL: 6.33E7  
T: + c Full ms [50.00-800.00]

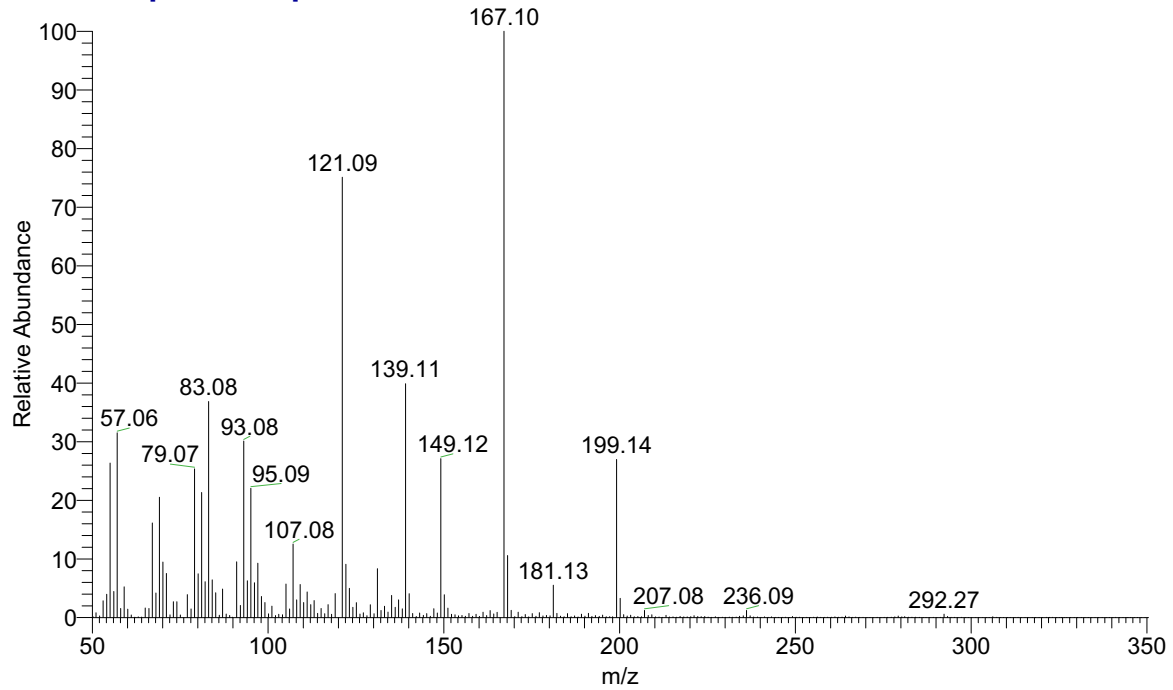



**Figure S15.** GC-EIMS spectrum of compound **3**

RT: 3.37 - 38.58

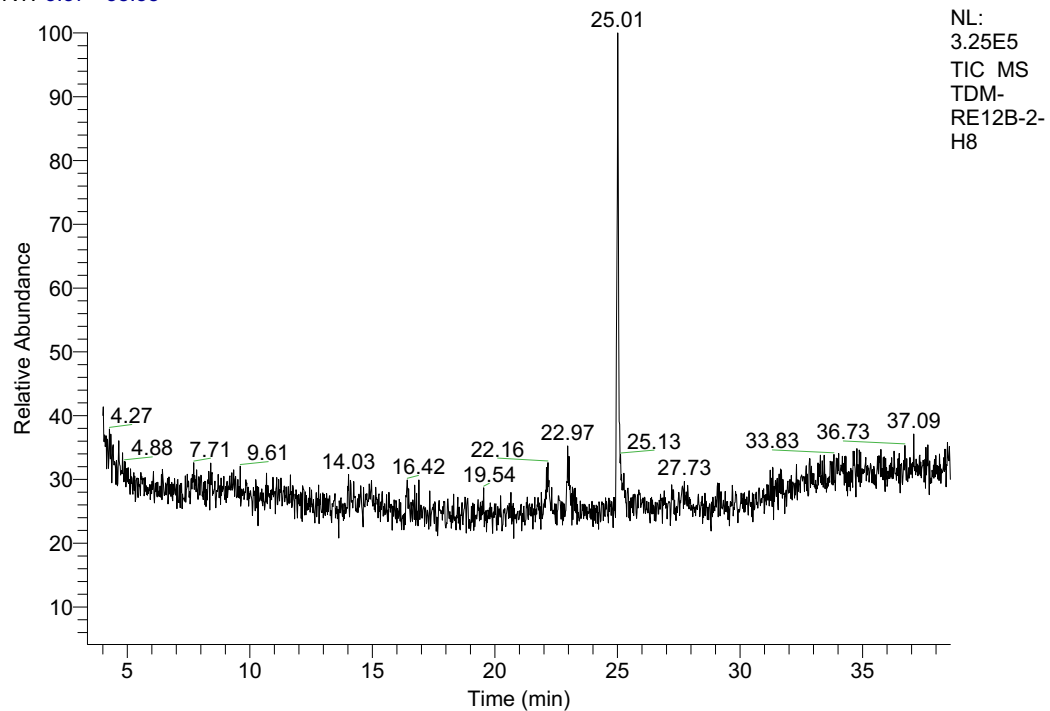

TDM-RE12B-2-H8 #1099 RT: 25.01 AV: 1 NL: 1.47E4  
T: + c Full ms [38.00-600.00]

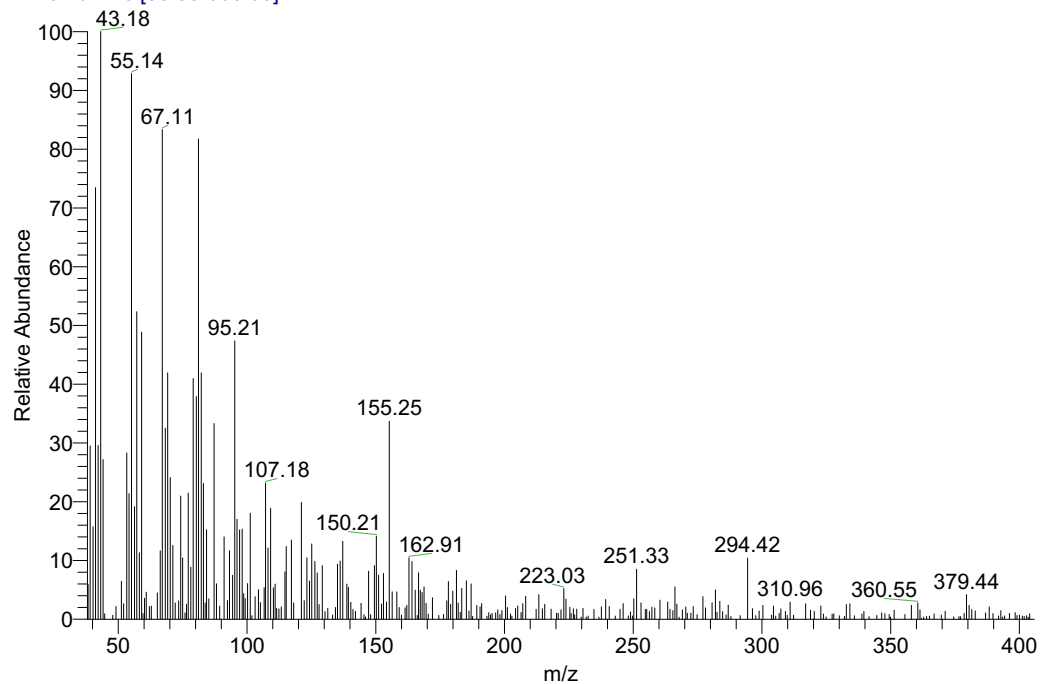

**Figure S16.** GC-EIMS spectrum of compound 4

RT: 7.39 - 38.56

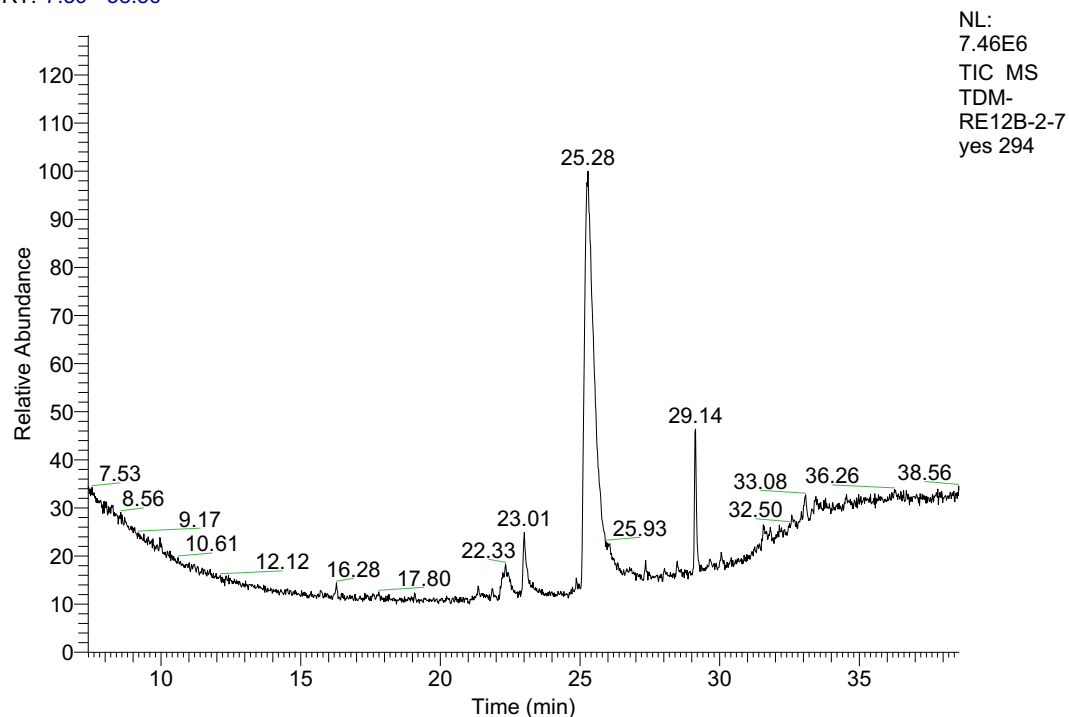

TDM-RE12B-2-7 yes 294 #1103-1117 RT: 25.11-25.38 AV: 15 NL: 3.62E5  
T: + c Full ms [38.00-600.00]

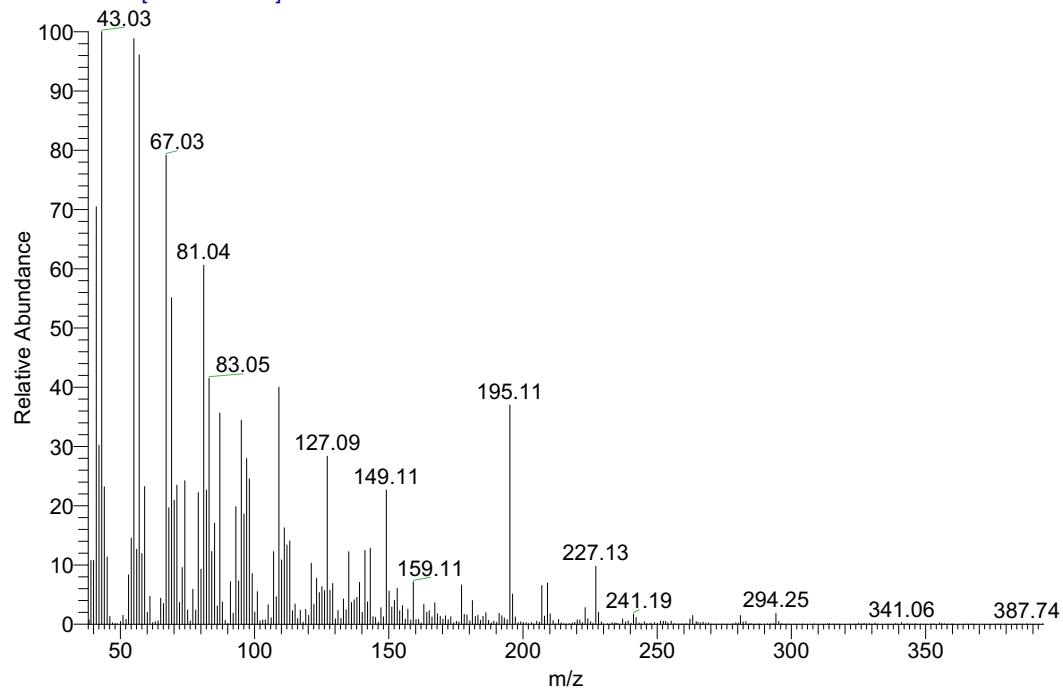

Figure S17. GC-EIMS spectrum of mixture A

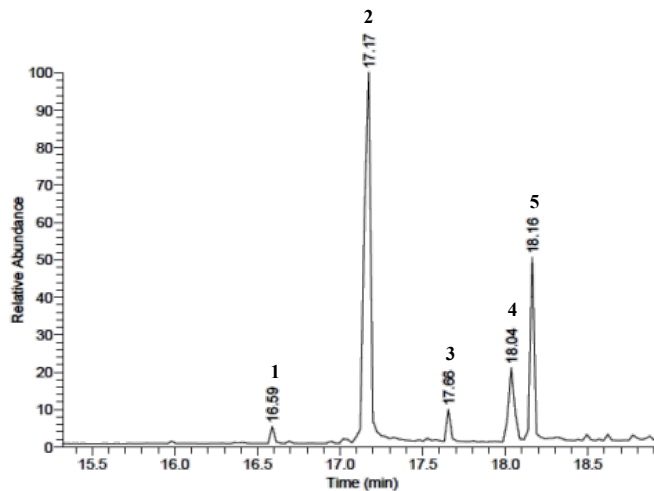

| No. | COMPOUND                          | FORMULA                                          | MW            | RT (min)     | PERCENTAGE (%) |
|-----|-----------------------------------|--------------------------------------------------|---------------|--------------|----------------|
| 1   | pentadecanoic acid methyl ester   | C <sub>16</sub> H <sub>32</sub> O <sub>2</sub>   | 256.23        | 16.59        | 1.91           |
| 2   | <b>palmitic acid methyl ester</b> | <b>C<sub>17</sub>H<sub>34</sub>O<sub>2</sub></b> | <b>270.21</b> | <b>17.17</b> | <b>64.21</b>   |
| 3   | margaric acid methyl ester        | C <sub>18</sub> H <sub>36</sub> O <sub>2</sub>   | 284.26        | 17.67        | 3.58           |
| 4   | oleic acid methyl ester           | C <sub>19</sub> H <sub>36</sub> O <sub>2</sub>   | 296.26        | 18.04        | 12.25          |
| 5   | stearic acid methyl ester         | C <sub>19</sub> H <sub>38</sub> O <sub>2</sub>   | 298.25        | 18.16        | 18.04          |

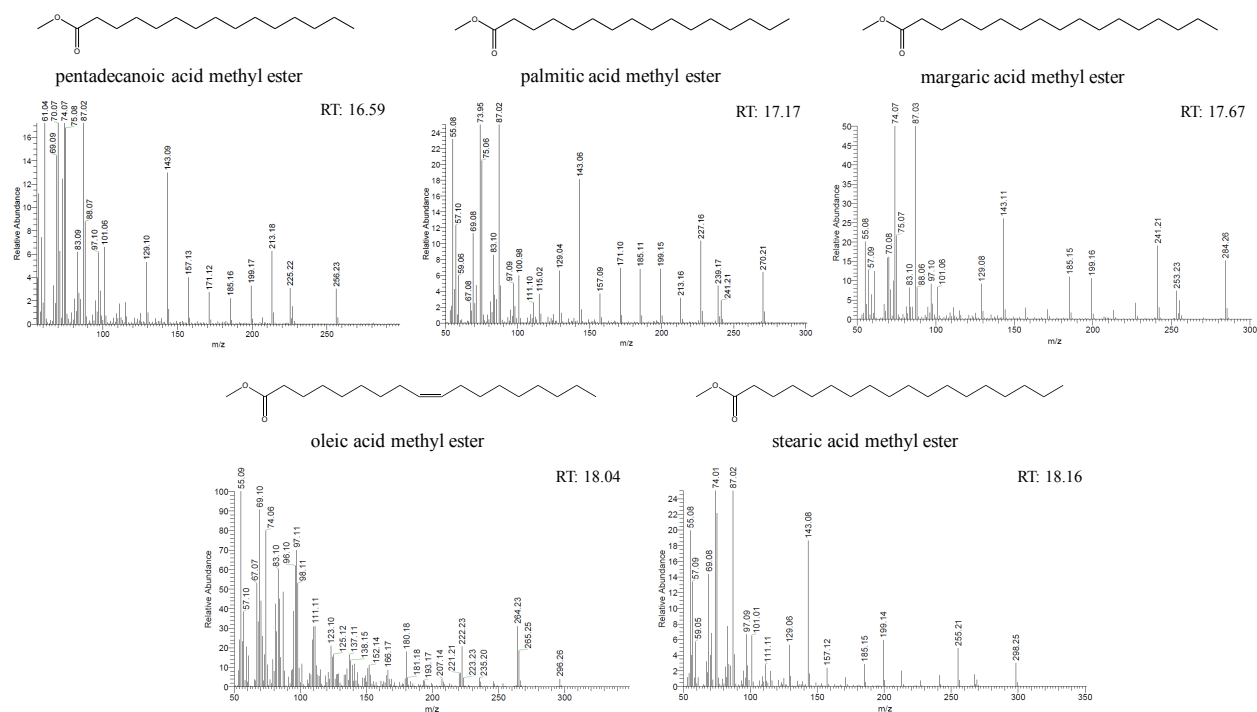

Figure S18. GC-EIMS spectrum of mixture B

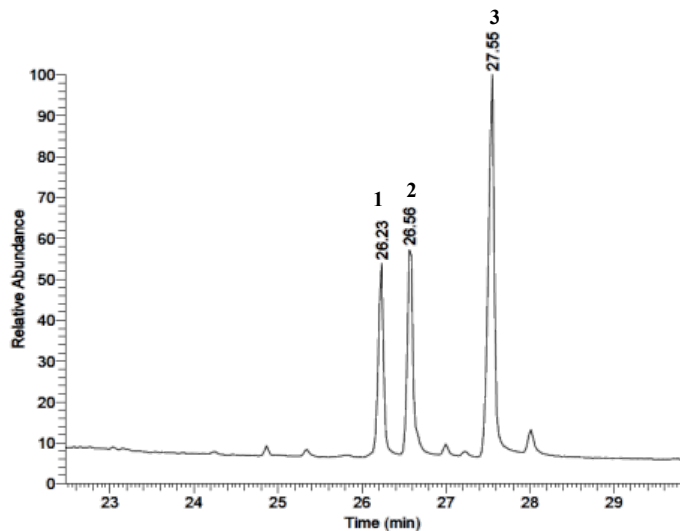

| No. | COMPOUND                   | FORMULA                              | MW            | RT (min)     | PERCENTAGE (%) |
|-----|----------------------------|--------------------------------------|---------------|--------------|----------------|
| 1   | campest-4-en-3-one         | C <sub>28</sub> H <sub>46</sub> O    | 398.67        | 26.23        | 22.75          |
| 2   | stigmast-4,22-dien-3-one   | C <sub>29</sub> H <sub>46</sub> O    | 410.68        | 26.56        | 26.04          |
| 3   | <b>β-sitost-4-en-3-one</b> | <b>C<sub>29</sub>H<sub>48</sub>O</b> | <b>412.70</b> | <b>27.55</b> | <b>51.21</b>   |

1. campest-4-en-3-one

22.75%

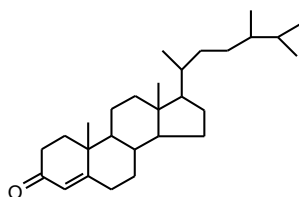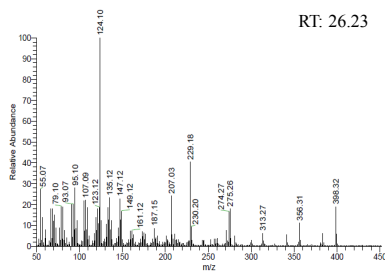

RT: 26.23

2. stigmast-4,22-dien-3-one

26.04%

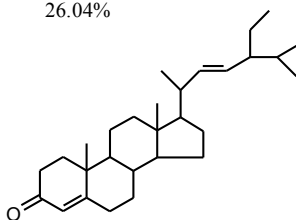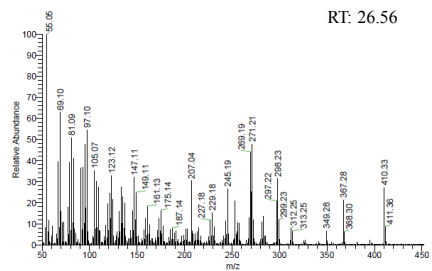

RT: 26.56

3. β-sitost-4-en-3-one

51.21%

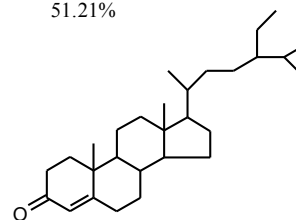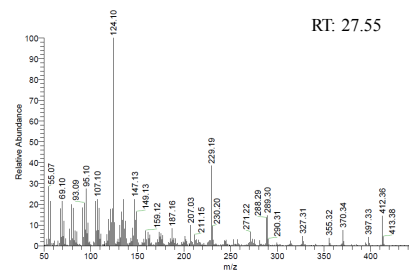

RT: 27.55

**Table S1.** Anti-allergic data of fatty acids (1 – 1000  $\mu$ M). Please see attached xlsx. file.

**Table S2.** Anti-platelet activity of *Typhonium blumei*

| <i>T. blumei</i> sample | Abbreviation | Concentration<br>( $\mu$ g/ml) | Inducer <sup>a</sup> |          |
|-------------------------|--------------|--------------------------------|----------------------|----------|
|                         |              |                                | Collagen             | Thrombin |
| Leaves crude            | TB-L         | 50                             | 28.2                 | 8.3      |
| Dichloromethane         | TB-LD        | 50                             | 93.6                 | 7.1      |
| Water                   | TB-LW        | 50                             | 16.7                 | 22.6     |
| Butanol                 | TB-LB        | 50                             | 100.0                | 100.0    |
| Hexane                  | TB-LH        | 50                             | 7.1                  | 4.8      |
| Methanol aq.            | TB-LM        | 50                             | -14.3                | 2.4      |
| Rhizomes crude          | TB-R         | 50                             | 17.1                 | 4.8      |
| Ethyl acetate           | TB-RE        | 50                             | 42.9                 | 16.7     |
| Water                   | TB-RW        | 50                             | 0.0                  | -2.4     |
| BuOH                    | TB-RB        | 50                             | 65.7                 | 31.0     |
| Hexane                  | TB-RH        | 50                             | 22.9                 | 11.9     |
| Methanol aq.            | TB-RM        | 50                             | 14.3                 | 7.1      |

<sup>a</sup>Platelets were incubated with samples (50  $\mu$ g/ml) or with vehicle for 3 min, followed by the addition of platelet inducers, collagen (10  $\mu$ g/ml) or thrombin (0.05 U/ml). Results are expressed as percent inhibition of platelet aggregation (n = 1); compared with the control value (collagen or thrombin). Active fractions are indicated by red color.

**Table S3.** Cytotoxicity of *T. blumei*

| <i>T. blumei</i> sample | Abbreviation | Concentration<br>(µg/ml) | Cancer cell line <sup>a</sup> |                    |                     |                   |                   |                         |
|-------------------------|--------------|--------------------------|-------------------------------|--------------------|---------------------|-------------------|-------------------|-------------------------|
|                         |              |                          | HepG2 <sup>b</sup>            | Hep3B <sup>b</sup> | Ca9-22 <sup>b</sup> | A549 <sup>b</sup> | MCF7 <sup>b</sup> | MDA-MB-231 <sup>b</sup> |
| <b>Leaves crude</b>     | TB-L         | 20                       | 23.2                          | 27.2               | 26.1                | 3.3               | 21.6              | 15.8                    |
| Dichloromethane         | TB-LD        | 20                       | 49.6                          | 36.2               | 42.4                | 25.9              | 44.3              | 22.9                    |
| Water                   | TB-LW        | 20                       | 17.8                          | 19.9               | 16.4                | 3.7               | 4.0               | -4.6                    |
| Butanol                 | TB-LB        | 20                       | 25.7                          | 19.9               | 18.9                | 10.2              | 14.0              | 5.4                     |
| Hexane                  | TB-LH        | 20                       | 24.8                          | 21.3               | 22.3                | 6.0               | 17.1              | 4.3                     |
| Methanol aq.            | TB-LM        | 20                       | 49.3                          | 17.9               | 32.7                | 12.1              | 31.8              | 15.9                    |
| <b>Rhizomes crude</b>   | TB-R         | 20                       | 5.2                           | 15.1               | 17.2                | 5.7               | 14.5              | 5.4                     |
| Ethyl acetate           | TB-RE        | 20                       | 51.7                          | 17.0               | 23.7                | 12.6              | 31.8              | 19.1                    |
| Water                   | TB-RW        | 20                       | 4.1                           | 8.8                | 5.2                 | 1.2               | 0.3               | 0.1                     |
| BuOH                    | TB-RB        | 20                       | 5.9                           | 8.5                | 3.6                 | -0.6              | -2.7              | -1.8                    |
| Hexane                  | TB-RH        | 20                       | 3.4                           | 16.9               | 21.9                | -2.1              | 7.3               | 2.3                     |
| Methanol aq.            | TB-RM        | 20                       | 48.1                          | 16.3               | 24.4                | 18.7              | 29.5              | 18.0                    |
| Doxorubicin             |              | 2                        | 93.9                          | 98.0               | 99.9                | 86.8              | 78.5              | 97.5                    |

<sup>a</sup>Cytotoxicity was evaluated using MTT viability assay; results are presented as percent inhibition of cell growth (n = 1); compared with the control value (DMSO). Active fractions are indicated by red color.

<sup>b</sup>Hep-G2: human hepatocellular carcinoma cells; Hep3B: human hepatocellular carcinoma cells; Ca9-22: oral squamous cell carcinoma cells; A549: human lung adenocarcinoma cells; MCF7: human adenocarcinoma cells; MDA-MB-231: human breast adenocarcinoma cells.

**Table S4.** Anti-inflammatory activity of *T. blumei*

| <i>T. blumei</i> sample | Abbreviation | Concentration<br>( $\mu\text{g/ml}$ ) | Anti-inflammatory assay <sup>a</sup> |                  |
|-------------------------|--------------|---------------------------------------|--------------------------------------|------------------|
|                         |              |                                       | Superoxide anion generation          | Elastase release |
| <b>Leaves crude</b>     | TB-L         | 10                                    | 46.7                                 | 22.6             |
| Dichloromethane         | TB-LD        | 10                                    | 80.0                                 | 88.4             |
| Water                   | TB-LW        | 10                                    | 18.0                                 | 10.5             |
| Butanol                 | TB-LB        | 10                                    | 78.2                                 | 84.5             |
| Hexane                  | TB-LH        | 10                                    | 43.1                                 | 74.4             |
| Methanol aq.            | TB-LM        | 10                                    | 98.6                                 | 95.6             |
| <b>Rhizomes crude</b>   | TB-R         | 10                                    | 42.1                                 | 12.2             |
| Ethyl acetate           | TB-RE        | 10                                    | 90.2                                 | 93.1             |
| Water                   | TB-RW        | 10                                    | 3.3                                  | 5.4              |
| BuOH                    | TB-RB        | 10                                    | 97.2                                 | 84.6             |
| Hexane                  | TB-RH        | 10                                    | 89.7                                 | 94.1             |
| Methanol aq.            | TB-RM        | 10                                    | 99.2                                 | 108.7            |

<sup>a</sup>Anti-inflammatory activity was evaluated by superoxide anion generation and elastase release assays in human neutrophils using fMLF/CB as inducer. Percent inhibition; results are presented as mean  $\pm$  SEM (n = 3 - 4); compared with the control value (fMLF/CB). Active fractions are indicated by red color.

**Table S5.** Cytotoxicity of *T. blumei* subfractions

| <i>T. blumei</i> rhizomes<br>ethyl acetate layer | Abbreviation | Concentration<br>( $\mu\text{g/ml}$ ) | Cancer cell line <sup>a</sup> |                   |                         |
|--------------------------------------------------|--------------|---------------------------------------|-------------------------------|-------------------|-------------------------|
|                                                  |              |                                       | HepG2 <sup>b</sup>            | A549 <sup>b</sup> | MDA-MB-231 <sup>b</sup> |
| TB-RE subfraction 1                              | TB-1         | 20                                    | -56.2                         | 4.6               | 12.7                    |
| TB-RE subfraction 2                              | TB-2         | 20                                    | -39.6                         | -2.9              | 5.6                     |
| TB-RE subfraction 3                              | TB-3         | 20                                    | -69.4                         | -0.3              | 6.6                     |
| TB-RE subfraction 4                              | TB-4         | 20                                    | -84.1                         | -1.5              | 4.1                     |
| TB-RE subfraction 5                              | TB-5         | 20                                    | -52.4                         | 1.6               | 3.0                     |
| TB-RE subfraction 6                              | TB-6         | 20                                    | -88.7                         | -2.1              | -0.9                    |
| TB-RE subfraction 7                              | TB-7         | 20                                    | 33.5                          | 30.9              | 18.5                    |
| TB-RE subfraction 8                              | TB-8         | 20                                    | -82.6                         | -5.6              | 2.0                     |
| TB-RE subfraction 9                              | TB-9         | 20                                    | 56.8                          | 25.3              | 23.3                    |
| TB-RE subfraction 10                             | TB-10        | 20                                    | -27.2                         | 3.9               | 5.8                     |
| TB-RE subfraction 11                             | TB-11        | 20                                    | -87.2                         | -7.7              | -4.9                    |
| TB-RE subfraction 12                             | TB-12        | 20                                    | -21.3                         | -6.6              | -14.8                   |
| TB-RE subfraction 13                             | TB-13        | 20                                    | -67.5                         | -16.7             | -16.6                   |
| Doxorubicin                                      |              | 2                                     | 95.2                          | 70.0              | 73.7                    |
|                                                  |              | 1                                     | 70.1                          | 22.1              | 31.9                    |
|                                                  |              | 0.5                                   | 58.7                          | 17.3              | 22.9                    |
|                                                  |              | 0.25                                  | 42.9                          | 16.5              | 14.7                    |

<sup>a</sup>Cytotoxicity was evaluated using MTT viability assay; results are presented as percent inhibition of cell growth (n = 1); compared with the control value (DMSO). Active fractions are indicated by red color.

<sup>b</sup>Hep-G2: human hepatocellular carcinoma cells; A549: human lung adenocarcinoma cells; MDA-MB-231: human breast adenocarcinoma cells.



**Table S6.** Anti-inflammatory activity of *T. blumei* subfractions

| <i>T. blumei</i> rhizomes<br>ethyl acetate layer | Abbreviation | Anti-inflammatory assay <sup>a</sup>  |                                       |
|--------------------------------------------------|--------------|---------------------------------------|---------------------------------------|
|                                                  |              | Superoxide anion generation           | Elastase release                      |
|                                                  |              | IC <sub>50</sub> (µg/ml) <sup>b</sup> | IC <sub>50</sub> (µg/ml) <sup>b</sup> |
| TB-RE subfraction 1                              | TB-1         | >10                                   | 3.8 ± 2.2                             |
| TB-RE subfraction 2                              | TB-2         | 2.0 ± 0.4                             | 2.9 ± 0.5                             |
| TB-RE subfraction 3                              | TB-3         | >10                                   | >10                                   |
| TB-RE subfraction 4                              | TB-4         | >10                                   | >10                                   |
| TB-RE subfraction 5                              | TB-5         | >10                                   | >10 <sup>c</sup>                      |
| TB-RE subfraction 6                              | TB-6         | >10 <sup>d</sup>                      | >10                                   |
| TB-RE subfraction 7                              | TB-7         | >10 <sup>e</sup>                      | 6.4 ± 0.9                             |
| TB-RE subfraction 8                              | TB-8         | 4.3 ± 0.6                             | 2.4 ± 0.5                             |
| TB-RE subfraction 9                              | TB-9         | 1.5 ± 0.2                             | 1.3 ± 0.1                             |
| TB-RE subfraction 10                             | TB-10        | 2.5 ± 0.6                             | 1.9 ± 0.6                             |
| TB-RE subfraction 11                             | TB-11        | 2.6 ± 0.6                             | 1.6 ± 0.3                             |
| TB-RE subfraction 12                             | TB-12        | >10 <sup>f</sup>                      | 4.2 ± 1.2                             |
| TB-RE subfraction 13                             | TB-13        | 6.5 ± 1.8                             | 2.3 ± 0.6                             |

<sup>a</sup>Anti-inflammatory capacity was evaluated by superoxide anion generation and elastase release assays in human neutrophils using fMLF/CB as inducer. IC<sub>50</sub> values; results are presented as mean ± SEM (n = 3 - 4); compared with the control value (fMLF/CB).

<sup>b</sup>IC<sub>50</sub> values express the concentration of the sample required to inhibit superoxide anion generation or elastase release by 50%.

<sup>c</sup>TB-5 exerted significant inhibitory activity in elastase release (22.9 ± 5.6%) assay at 10 µM.

<sup>d</sup>TB-6 exerted significant inhibitory activity in superoxide anion generation (23.2 ± 3.7%) assay at 10 µM.

<sup>e</sup>TB-7 exerted significant inhibitory activity in superoxide anion generation (39.4 ± 1.3%) assay at 10 µM.

<sup>f</sup>TB-12 exerted significant inhibitory activity in superoxide anion generation (14.8 ± 1.4%) assay at 10 µM.

**Table S7.** Anti-allergic activity of *T. blumei* subfractions

| <i>T. blumei</i> rhizomes<br>ethyl acetate layer | Abbreviation | Inhibition of A23187-induced $\beta$ -hexosaminidase release <sup>a</sup> |             |       |
|--------------------------------------------------|--------------|---------------------------------------------------------------------------|-------------|-------|
|                                                  |              | Concentration ( $\mu\text{g/ml}$ )                                        |             |       |
|                                                  |              | 10.0                                                                      | 50.0        | 100.0 |
| TB-RE subfraction 1                              | TB-1         | —                                                                         | —           | —     |
| TB-RE subfraction 2                              | TB-2         | —                                                                         | —           | 30.7  |
| TB-RE subfraction 3                              | TB-3         | —                                                                         | —           | —     |
| TB-RE subfraction 4                              | TB-4         | —                                                                         | —           | 27.0  |
| TB-RE subfraction 5                              | TB-5         | —                                                                         | —           | —     |
| TB-RE subfraction 6                              | TB-6         | —                                                                         | —           | —     |
| TB-RE subfraction 7                              | TB-7         | —                                                                         | —           | 41.0  |
| TB-RE subfraction 8                              | TB-8         | —                                                                         | —           | —     |
| TB-RE subfraction 9                              | TB-9         | 27.7                                                                      | 42.7        | TOXIC |
| TB-RE subfraction 10                             | TB-10        | —                                                                         | 42.0        | TOXIC |
| TB-RE subfraction 11                             | TB-11        | —                                                                         | —           | 25.7  |
| TB-RE subfraction 12                             | TB-12        | —                                                                         | —           | —     |
| TB-RE subfraction 13                             | TB-13        | —                                                                         | —           | —     |
| Dexamethasone                                    |              |                                                                           | 80% (50 nM) |       |

<sup>a</sup> The cytotoxicity of samples to RBL-2H3 was evaluated using MTT viability assay and the toxic concentrations are labelled as 'TOXIC' (viability less than 80%). The inhibition of degranulation was assessed by A23187-induced  $\beta$ -hexosaminidase release in RBL-2H3 cells; percent inhibition; results are presented as mean (n = 3); compared with the control value (A23187). — not active (insignificant inhibition of degranulation, below 20%)
